1           **The unforeseen intracellular lifestyle of *Enterococcus faecalis* in hepatocytes**

2

3   Natalia Nunez<sup>1#</sup>, Aurélie Derré-Bobillot<sup>1</sup>, Goran Lakisic<sup>1</sup>, Alexandre Lecomte<sup>1</sup>, Françoise  
4   Mercier-Nomé<sup>2</sup>, Anne-Marie Cassard<sup>3</sup>, Hélène Bierre<sup>1</sup>, Pascale Serror\*<sup>1</sup>, and Cristel  
5   Archambaud\*<sup>1</sup>

6

7

8

9   <sup>1</sup>Université Paris-Saclay, INRAE, AgroParisTech, Micalis Institute, 78350, Jouy-en-Josas,  
10   France

11   <sup>2</sup>Université Paris-Saclay, INSERM, CNRS, Institut Paris Saclay d'Innovation Thérapeutique,  
12   Châtenay-Malabry, France.

13   <sup>3</sup>Université Paris-Saclay, INSERM U996, Inflammation, Microbiome and  
14   Immunosurveillance, 92140, Clamart, France.

15   # Present address: Life & Soft, 92060 Plessis-Robinson, France

16

17

18   \*Corresponding authors: [cristel.archambaud@inrae.fr](mailto:cristel.archambaud@inrae.fr) ; [pascale.serror@inrae.fr](mailto:pascale.serror@inrae.fr)

19   Tel: +33134652265

20   Fax: +33134652065

21

22   **Key words (5-10):** *Enterococcus faecalis*, pathobiont, hepatocytes, intracellular lifestyle, liver

23 **Abstract (< 150 WORDS)**

24 *Enterococcus faecalis* is a bacterial species present at a sub-dominant level in the human  
25 gut microbiota. This commensal turns into an opportunistic pathogen under specific conditions  
26 involving dysbiosis and host immune deficiency. *E. faecalis* is also the only intestinal  
27 pathobiont identified to date as contributing to liver damage in alcoholic liver disease. We have  
28 previously observed that *E. faecalis* is internalized in hepatocytes. Here, the survival and fate  
29 of *E. faecalis* was examined in hepatocytes, the main epithelial cell type in the liver. Although  
30 referred to as an extracellular pathogen, we demonstrate that *E. faecalis* is able to survive and  
31 divide in hepatocytes, and form intracellular clusters in two distinct hepatocyte cell lines, in  
32 primary mouse hepatocytes, as well as *in vivo*. This novel process extends to kidney cells.  
33 Unravelling the intracellular lifestyle of *E. faecalis*, our findings contribute to the understanding  
34 of pathobiont-driven diseases.

## 35 **Introduction**

36           Among chronic liver diseases, alcoholic liver diseases, non-alcoholic fatty liver  
37 diseases, chronic viral hepatitis, and hemochromatosis are the most common worldwide  
38 diseases <sup>1</sup>. These liver disorders are associated with prolonged alcohol consumption, infections,  
39 autoimmune diseases, and genetic and metabolic disorders. Recently, dysbiosis within the  
40 intestinal microbiota, associated with a decrease in the diversity of microbial populations and  
41 the proliferation of potentially pathogenic species, has been recognized as an important  
42 additional factor in the etiology of liver diseases <sup>2</sup>. *Enterococcus faecalis* is a sub-dominant  
43 commensal bacterium of the human gut microbiota and can become pathogenic under specific  
44 conditions involving gut dysbiosis and host immune deficiency <sup>3</sup>. While antibiotic treatments  
45 are well known to cause enterococcal overgrowth, which may lead to systemic infection in  
46 immunocompromised patients, other drug treatments trigger intestinal dysbiosis. For example,  
47 the long-term use of proton pump inhibitors (PPIs), frequently prescribed in patients with liver  
48 diseases, is associated with harsh effects such as the development of spontaneous bacterial  
49 peritonitis and an increased risk of developing hepatic pyogenic abscesses <sup>4,5</sup>. PPI treatments  
50 are associated with significant changes in the intestinal microbiota, including an increase in the  
51 genera *Enterococcus*, *Streptococcus*, and *Staphylococcus* and the species *Escherichia coli* <sup>6</sup>.  
52 Notably, patients with liver disease frequently present a dysbiotic microbiota with an  
53 overgrowth of enterococci <sup>7,8</sup>.

54           While a link between vancomycin-resistant enterococci (VRE) intestinal domination  
55 and bloodstream infections has been reported <sup>9-11</sup>, the translocation of enterococci to the liver  
56 has not yet been fully established in patients. In contrast, we and others reported enterococcal  
57 translocation from the gut to the liver in rodent models <sup>12-15</sup>. In alcohol-mediated liver disease,  
58 ethanol consumption increases intestinal permeability by disrupting the gut microbiota and  
59 tight-junction integrity. Alcohol and PPI treatment are known to benefit *E. faecalis*

60 translocation, which promotes inflammation mediated by toll-like receptors (TLR) on Kupffer  
61 cells that recognize extracellular *E. faecalis* in the liver<sup>14</sup>. Their findings were corroborated by  
62 the significant increase in *Enterococcus* in the stool of healthy individuals after two weeks of  
63 treatment with PPIs and in chronic alcohol users taking PPIs<sup>14</sup>. More recently, it has been  
64 shown that the severity of alcoholic hepatitis and mortality of patients with alcoholic hepatitis  
65 are consistent with the presence of *E. faecalis* expressing cytolysin, a toxin capable of lysing  
66 bacteria and cells<sup>16</sup>.

67 *E. faecalis* is generally described as an extracellular bacterium capable of entering and  
68 surviving in mammalian cells. *E. faecalis* can enter and survive in non-professional phagocytic  
69 cells, like intestinal epithelial cells, urothelial cells from the bladder, and endothelial cells<sup>17-22</sup>.  
70 Several invasion pathways relying on cytoskeleton components have been proposed<sup>17,22</sup>. Upon  
71 internalization in epithelial cells, *E. faecalis* has been observed in endosomal compartments or  
72 organized into intracellular colonies<sup>17, 18, 23</sup>. If enterococci survive within macrophages for  
73 extended periods, likely due to their ability to reduce host cell autophagy and to prevent its  
74 delivery in typical LC3<sup>+</sup> autophagic compartments<sup>24-26</sup>, how they survive and persist in  
75 epithelial cells remains to be established. Conversely, intestinal epithelial autophagy can be  
76 activated by *E. faecalis* and coincides with the formation of autophagosomes surrounding *E.*  
77 *faecalis*<sup>27</sup>. The fate of *E. faecalis* once internalized in epithelial cells seems to be much more  
78 complex to assess and probably depends on the specialization of different epithelial cell types.

79 We previously observed that *E. faecalis* is internalized in HepG2 hepatic cells<sup>28</sup>.  
80 Considering increasing evidence that intestinal *E. faecalis* may be able to reach the liver of  
81 patients, this study examined the interactions between *E. faecalis* and hepatocytes, which  
82 account for 70% of hepatic cells in the liver, in more detail. Using two human hepatocyte  
83 models of infection, *ex vivo* and *in vivo* models, the fate of *E. faecalis* was investigated after its  
84 internalization in hepatocytes.

## 85 **Results**

### 86 ***Intracellular growth of E. faecalis during the infection of human hepatocytes***

87           To investigate the fate of *E. faecalis* in hepatocytes, the capacity of *E. faecalis* strain  
88 OG1RF, a human isolate, was assessed to determine its invasion and survival ability within  
89 human Huh7 hepatocytes by comparing the number of intracellular bacteria to the initial  
90 inoculum (Figure 1A, left inset). The hepatocytes were infected for 3 h with *E. faecalis* before  
91 the addition of a gentamicin- and vancomycin-containing medium to kill the extracellular  
92 bacteria. One h after antibiotic treatment, the median level of invasion of Huh7 by OG1RF was  
93 about 0.08%. Notably, the level of intracellular enterococci reached a median value of about  
94 0.16% 24 h post-antibiotic treatment (pa) This indicates that the intracellular bacterial ratio  
95 doubled in 24 h. This percentage remained high 48 h pa, indicating that intracellular *E. faecalis*  
96 bacteria not only survive but proliferate within Huh7 cells. The antibiotic protection assay is  
97 commonly used to study intracellular pathogens, but several studies have reported that some  
98 antibiotics penetrate and accumulate within the host cells, affecting the intracellular growth of  
99 the pathogen <sup>29, 30</sup>. The addition of amoxicillin, a well-known  $\beta$ -lactam antibiotic used to kill  
100 intracellular pathogens <sup>31</sup>, was tested to determine its effect on the increase of intracellular  
101 enterococci during infection. As shown in Figure 1A (right insert), while the percentage of  
102 intracellular *E. faecalis* was comparable 1 h pa to that observed without amoxicillin, the  
103 percentage decreased dramatically at 24 and 48 h. These data indicate that the penetration and  
104 accumulation of amoxicillin in Huh7 cells decreases the intracellular level of enterococci in  
105 hepatocytes. As amoxicillin mainly targets dividing bacteria by blocking the cross-linking  
106 process during peptidoglycan synthesis, this result indicates that *E. faecalis* bacteria are able to  
107 divide within the host cell.

108

109 To confirm this hypothesis, a fluorescent D-amino acid, which is incorporated into the  
110 bacterial cell wall and labels the newly formed peptidoglycan in live bacteria<sup>32</sup>, was used. First,  
111 the RADA molecule was added to enterococcal exponential cultures and a fluorescent signal  
112 was detected in the mid cell corresponding to the septal ring and to equatorial rings (Figure 1B).  
113 Next, GFP-expressing *E. faecalis* infected Huh7 hepatocytes were incubated with RADA  
114 (orange-red TAMRA-based fluorescent D-amino acid) in the cell culture medium for 24 h, after  
115 12 h in the antibiotic-containing medium. Intracellular *E. faecalis* showed an incorporation of  
116 the RADA molecule in their cell wall compared to the remaining antibiotic-killed extracellular  
117 bacteria (Figure 1C and Figure S1). Notably, RADA-labelled cocci and diplococci were  
118 organized into groups. For both, localization patterns of incorporated RADA included signals  
119 detected in the mid cell corresponding to the septal ring and to duplicated equatorial ring signals  
120 corresponding to the elongation step of cell division, similar to those obtained from *E. faecalis*  
121 growing in rich medium. RADA incorporation definitively supports intracellular growth during  
122 *E. faecalis* infection of hepatocytes.

123

#### 124 ***Formation of enterococcal clusters accompanies E. faecalis growth within hepatocytes***

125 To get insights into the *E. faecalis* growth in hepatocytes, differential  
126 immunofluorescence labelling was performed to track intracellular *E. faecalis* internalized in  
127 Huh7 hepatocytes<sup>33,34</sup>. The presence of intracellular cocci and diplococci organized in chains  
128 or groups, which we hereafter called “clusters” when the number of bacteria inside included at  
129 least four cocci, were confirmed (Figure 2A). The appearance of these intracellular clusters was  
130 quantified in Huh7 hepatocytes between 30 min and 48 h pa, and the numbers of cocci per  
131 cluster was determined. Enterococcal clusters were detectable after 30 min in 3% of the infected  
132 cells. Compared to 30 min, the median value of the Huh7 cells exhibiting at least one  
133 enterococcal cluster significantly increased to 9% after 24 h pa (Figure S2A). The number of

134 cocci per cluster showed a significant increase in the size of the intracellular enterococcal  
135 clusters in the Huh7 hepatocytes during infection. While the median value of the number of  
136 enterococci within a cluster was four at 30 min pa, it reached seven bacteria 48 h later (Figure  
137 S2B). Notably, clusters including more than ten bacteria were rare at 2 h, whereas those with  
138 ten and more than 20 cocci increased between 2 and 48 h pa (Figure 2B). These results revealed  
139 the formation of enterococcal clusters whose size increased during infection. The formation of  
140 *E. faecalis* OG1RF clusters in two other cell types, HepG2 cells and in primary mouse  
141 hepatocytes, was also examined (Figure 2C). At 24 h pa, intracellular clusters were observed in  
142 both cell types, as described in Huh7 cells. Detection of clusters in primary mouse hepatocytes  
143 showed that the formation of intracellular enterococcal clusters was independent of the  
144 immortalized phenotype of the two hepatocyte cell lines. Together, our data show that  
145 intracellular *E. faecalis* growth is accompanied by the formation of clusters during hepatocyte  
146 infection.

147

148 ***Intracellular enterococcal clusters form in the mouse liver, and enterococcal infection***  
149 ***associates with sequential changes in Kupffer macrophages and neutrophil populations***

150 To track enterococcal clusters within hepatocytes *in vivo*, *E. faecalis* strain OG1RF,  
151 expressing the *luxABCDE(lux)* operon from *Photorhabdus luminescens* driven by a constitutive  
152 promoter, was used. Compared to non-infected control mice, a luminescent signal was detected  
153 6 h post-infection (pi) in mice infected intravenously (Figure S3). The signal emitted by the  
154 liver remained mostly stable or increased 24 h pi. Since the border of the bigger left lobe emitted  
155 a very strong signal (Figure S3), an immunohistological analysis was performed on this  
156 delimited area. As shown in Figure 3A, the presence of *E. faecalis* on lobe liver sections was  
157 detected through green signals emitted from round foci compared to noninfected mice. The size  
158 of these *E. faecalis* infection foci increased at 24 h pi (Figure 3A). At higher magnification,

159 enterococcal clusters were clearly identified within multinucleated hepatocytes, highly  
160 expressing the protein claudin-1<sup>35</sup>, indicating that the intracellular *E. faecalis* division in  
161 hepatocytes also occurs *in vivo* (Figure 3B).

162 Kupffer cells are resident liver macrophages that play a crucial role in the innate immune  
163 response and are responsible for the clearance of pathogens reaching the liver. The distribution  
164 of Kupffer cells was compared along the liver sections between noninfected mice and mice  
165 infected for 6 and 24 h with *E. faecalis*. Based on the surface area of noninfected mice, 35  
166 F4/80<sup>+</sup> macrophages/mm<sup>2</sup> were observed. This number increased to about 53 macrophages/mm<sup>2</sup>  
167 at 6 h pi. The number of macrophages decreased significantly to less than 5 macrophages/mm<sup>2</sup>  
168 in mice infected for 24 h, showing an almost complete disappearance of the liver resident  
169 macrophages (Figure 3C). Although less abundant in the liver of control mice with 2 to 8 Ly6G<sup>+</sup>  
170 neutrophils/mm<sup>2</sup>, the neutrophil population exhibited about a ten-fold increase, reaching 70  
171 neutrophils/mm<sup>2</sup> within the first 6 h of infection, before becoming almost undetectable 24 h pi.  
172 Together, these data show that the innate immune response to counteract *E. faecalis* infection  
173 is induced during the first hours of the infection, followed by a drastic depletion in macrophage  
174 and neutrophil cell density.

175

### 176 ***Is E. faecalis intracellular growth a common process?***

177 To investigate whether intracellular growth is a widespread process among *E. faecalis*,  
178 the behavior of two other human *E. faecalis* strains from distinct origins were tested in addition  
179 to our reference OG1RF strain, namely another clinical strain (JH2-2) and a probiotic strain  
180 (Symbioflor) in HepG2 cells. For all strains, the number of internalized bacteria were compared  
181 to the initial inoculum and an increase in the percentage of intracellular OG1RF and JH2-2  
182 bacteria was observed (Figure 4A). In contrast, the percentage of intracellular bacteria did not  
183 significantly change for the Symbioflor strain, supporting that *E. faecalis* growth in hepatocytes



184 is a strain-dependent process. Next, since a cluster of intracellular *E. faecalis* was observed in  
185 urothelial cells, as well as the presence of intracellular microcolonies<sup>18, 23</sup>, *E. faecalis* growth  
186 was examined in two human kidney cancer cell lines. A704 and ACHN cells were used in a 48-  
187 h infection assay with the three *E. faecalis* strains. *E. faecalis* infection strongly differed  
188 between the two cell types. A704 kidney cells were more permissive for *E. faecalis* invasion  
189 and intracellular growth than ACHN cells, in which none of the strains grew (Figures 4B and  
190 4C). In contrast to our observation during HepG2 infection, the level of intracellular Symbioflor  
191 strain increased in the A704 kidney cells 24 h pa. Although the same trend was observed for  
192 the OG1RF and JH2-2 strains, the intracellular level of each strain did not significantly change  
193 in kidney A704 cells. Notably, intracellular levels of OG1RF and JH2-2 decreased at 48 h,  
194 suggesting that the A704 cells may not be as permissive for the growth of these strains. To  
195 pursue this comparison, the percentage of kidney cells with intracellular OG1RF was  
196 determined according to the size of the clusters (Figure S4). Although large intracellular  
197 enterococcal clusters containing more than 10 enterococci were both detected in A704 and  
198 ACHN cells, the percentage of infected cells containing these large clusters remained low over  
199 time, compared to Huh7 hepatocytes (Figure 2B). Altogether, our results show that *E. faecalis*  
200 intracellular growth is not restricted to a specific cell type and may depend on a specific strain  
201 and cell-type combination.

## 202 Discussion

203 *E. faecalis* is a unique opportunistic pathogen identified as contributing to liver damage  
204 in alcoholic liver disease <sup>36</sup>. The present study demonstrated that *E. faecalis* replicates  
205 intracellularly in the liver. We highlighted that intracellular *E. faecalis* synthesizes  
206 peptidoglycan during the infection of hepatocytes and *E. faecalis* clusters form in two distinct  
207 hepatocyte cell lines, in primary mouse hepatocytes as well as *in vivo*. To our knowledge, this  
208 is the first demonstration of enterococcal intracellular division in mammalian cells. We also  
209 showed that induction of the liver innate immunity is followed by an almost disappearance of  
210 two major subsets, as the resident macrophages and the neutrophils, coinciding with the  
211 formation and spread of enterococcal foci. Finally, we showed that *E. faecalis* intracellular  
212 division can be extended to kidney cells. Overall, although all cell types may not be equally  
213 permissive for enterococcal growth, our findings indicate that this process is not restricted to a  
214 specific cell type. Indeed, during completion of this manuscript Tay *et al* reached similar  
215 conclusion that *E. faecalis* can survive and replicate after its internalization in keratinocytes <sup>37</sup>.

216 The concept of an intracellular lifestyle has emerged quite recently for several  
217 opportunistic pathogens generally recognized as extracellular pathogens. O'Neill et al. (2016)  
218 provided the first direct evidence of group A *Streptococcus* replication inside human  
219 macrophages <sup>38</sup>. Since then, intracellular replication of *Streptococcus pneumoniae* has also been  
220 observed in splenic macrophages <sup>39</sup>. *Staphylococcus aureus*, which was historically regarded  
221 as a classical toxin-producing extracellular pathogen, is now widely accepted as a facultative  
222 intracellular pathogen <sup>40</sup>. Very recently, Salcedo's group described an intracellular niche for  
223 *Acinetobacter baumannii*, another nosocomial pathogen mainly described as an extracellular  
224 pathogen with restricted survival within cells <sup>41</sup>. Some pathogenic fungi, such as *Blastomyces*  
225 *dermatitidis*, can also display a facultative intracellular lifestyle <sup>42</sup>. Based on our findings and  
226 others <sup>18, 23</sup>, *E. faecalis* can grow intracellularly and form microcolonies in hepatocytes, in

227 kidney cells and in urothelial cells. In line with the contribution of *E. faecalis* to liver damage  
228 in alcoholic liver disease and its incidence with urinary tract infections, the liver, bladder, and  
229 kidneys are relevant target tissues. Future investigations on *E. faecalis* intracellular lifestyle  
230 will make sense, especially in light of the variety of organs or host sites targeted by *E. faecalis*.

231         Deciphering the cellular mechanisms and identifying the bacterial determinants  
232 supporting *E. faecalis* intracellular division in hepatocytes remains challenging. Several factors  
233 are known to be involved in *E. faecalis* stress tolerance and pathogenesis<sup>43</sup>. Consistent with  
234 the generalist status and metabolic flexibility of *E. faecalis* isolates, intracellular growth of *E.*  
235 *faecalis* may be a strain-dependent mechanism. Moreover, the ability of the Symbioflor strain  
236 to grow intracellularly in kidney cells and not in hepatocytes supports that *E. faecalis*  
237 intracellular growth may require a specific strain and cell-type combination. Among several  
238 mechanisms, hijacking the host endocytic and autophagy pathways is a common strategy for  
239 intracellular pathogens<sup>44</sup>. *E. faecalis* is able to survive for up to 72 h within macrophages<sup>25</sup>.  
240 Zou and Shankar (2016) showed that *E. faecalis* can delay lysosomal fusion of the enterococcal-  
241 containing compartment in macrophages. They found two types of enterococcal populations  
242 with some *E. faecalis* surrounded by single membrane vacuoles and some that had lost their  
243 vacuolar compartment, suggesting that the latter may escape and reside in the cytoplasm<sup>24</sup>.  
244 Autophagy is a conserved process in which cytoplasmic components are targeted to the  
245 lysosomes for degradation. While *E. faecalis* entry into epithelial cells is a well-admitted  
246 process, the epithelial cell intrinsic mechanisms that detects and targets intracellular *E. faecalis*  
247 has begun to be explored. Hooper's team showed that autophagy in intestinal epithelial cells  
248 was activated by *E. faecalis*, which is entrapped in double-membrane autophagosomes<sup>27</sup>. Their  
249 results also suggested that *E. faecalis* reaches the cytosol during the infectious process. Tay *et*  
250 *al.* showed that once internalized into keratinocytes via macropinocytosis in single membrane-  
251 bound compartments, some intracellular *E. faecalis* are detected in early and late endosomes

252 and proposed that intracellular replication occurs within late endosomes until a threshold is  
253 reached and some bacteria are released into the cytosol <sup>37</sup>. In line with their findings, we  
254 observed very few *E. faecalis* in Rab5- or EEA1-positive compartments during the first hours  
255 of the infection (data not shown). Moreover, at later time points, enterococcal clusters were not  
256 localized into acidic compartments. Finally, the almost complete disappearance of intracellular  
257 *E. faecalis* in hepatocytes exposed to amoxicillin, which diffuses through cell membranes and  
258 penetrates the cytoplasm, further supports that at least one enterococcal population is located  
259 in the cytosol, where it divides.

260         The liver plays a major role in the clearance and response to commensal bacteria  
261 translocating from the gastrointestinal tract and to enteropathogens, such as *E. coli* and *Listeria*  
262 *monocytogenes*. This protective role is mostly mediated by resident Kupffer macrophages. The  
263 latter participate in the innate immune response at several levels by clearing bacteria, secreting  
264 soluble inflammatory mediators, and/or physically interacting with effectors of other cell types  
265 <sup>45</sup>. Rapid recruitment of neutrophils is an additional important line of defense, particularly for  
266 the rapid clearance of *E. faecalis* and *E. faecium* <sup>46, 47</sup>. Accordingly, severely ill patients with  
267 hematologic malignancies and deep neutropenia were at an increased risk of developing  
268 enterococcal infections. Here, a strong recruitment of neutrophils and an increase in Kupffer  
269 macrophages were observed in the livers of mice infected with *E. faecalis*, followed by an  
270 almost disappearance of both cell types, coinciding with the formation and spread of  
271 enterococcal foci. We hypothesize that the oxidative burst generated in Kupffer cells and  
272 neutrophils leads to the depletion of innate cells in the liver, creating favorable conditions for  
273 the formation of intracellular enterococcal clusters. In their most severe form, liver diseases are  
274 associated with a high risk of mortality, and treatment options are often limited. Identifying  
275 factors that contribute to the onset and progression of liver injury is necessary to improve the  
276 management of patients with liver diseases. *E. faecalis* translocation to the liver leads to

277 detrimental inflammation for the host in several rodent models by extracellular bacteria<sup>14, 16, 48</sup>.  
278 The intracellular location of *E. faecalis* in hepatocytes may be a protective niche against  
279 immune detection and may favor the establishment of *E. faecalis* in the liver. If extracellular *E.*  
280 *faecalis* has been shown to mediate inflammation in the liver upon intestinal translocation in a  
281 mouse model<sup>14, 16, 48</sup>, the possibility of intracellular *E. faecalis* within hepatocytes contributing  
282 to liver disorders has not been considered thus far. Further studies will help to determine how  
283 this novel intracellular lifestyle may contribute to liver diseases and possibly other diseases.

## 284 **Materials and methods**

### 285 ***Bacterial strains***

286 *E. faecalis* strains OG1RF<sup>49</sup>, JH2-2<sup>50</sup>, and Symbioflor (a gift from Dr. E. Domann  
287 Institute of Medical Microbiology, University of Giessen, Germany) were cultured in brain  
288 heart infusion (BHI) at 37°C without aeration. GFP-expressing OG1RF from the pMV158-GFP  
289 plasmid was cultured in BHI with 4 µg/ml tetracycline<sup>51</sup>. *E. faecalis* strain OG1RF, expressing  
290 the *luxABCDE (lux)* operon from *Photobacterium luminescens*, was a gift from Dr. D. Lechardeur  
291 (Micalis Institute, INRAE, Centre de Recherche Ile de France—Jouy-en-Josas - Antony)<sup>52</sup> and  
292 was cultured in BHI with 20 µg/ml erythromycin.

293

### 294 ***Cell lines***

295 The human hepatocellular carcinoma Huh7 cell line (CLS 300156) was cultured in  
296 Dulbecco's modified eagle medium (DMEM, Gibco) with glutamax supplemented with 10%  
297 FBS. The human hepatocellular carcinoma HepG2 cell line (ATCC HB-8065) and the human  
298 kidney adenocarcinoma A-704 cell line (ECACC 93020513) were grown in minimum essential  
299 medium (MEM, Gibco) with glutamax supplemented with 10% FBS, 0.1 mM non-essential  
300 amino acids, and 1 mM sodium pyruvate. The human kidney adenocarcinoma ACHN cell line  
301 (ECACC 88100508) was grown in MEM with glutamax with 10% FBS and 0.1 mM non-  
302 essential amino acids. All cell lines were cultured at 37°C in a 5% CO<sub>2</sub> atmosphere.

303

### 304 ***Cell infection***

305 Two or four days before infection, cells were seeded in triplicate in 24-well plates or on  
306 glass coverslips for immunofluorescence analysis. Prior to infection, cells were washed once  
307 with PBS and incubated in serum-free medium for 2 h. *E. faecalis* strains were grown until  
308 bacteria reached the mid-exponential phase. Bacteria were harvested, washed twice in

309 phosphate-buffered saline (PBS), and resuspended in medium without serum to be used at a  
310 multiplicity of infection (MOI) of 50. Infection was synchronized by 1 min centrifugation at  
311 1000 g. After 3 h of contact, cells were washed 5 times with PBS, and an antibiotic cocktail  
312 was added to kill extracellular bacteria. A first antibiotic cocktail (150 µg/ml gentamicin and  
313 10 µg/ml vancomycin) was added for 24 h and then replaced by another antibiotic cocktail (37.5  
314 µg/ml gentamicin and 5 µg/ml vancomycin) for the rest of infection. When indicated,  
315 amoxicillin was added to the antibiotic cocktail (125 µg/ml and diluted at 50 µg/ml after 24 h  
316 of infection). The efficiency of the antibiotic cocktails was controlled by the absence of viable  
317 colonies after plating of the cell supernatants. When required, cells were lysed using cold  
318 distilled water for 10 min at 4°C to enumerate intracellular bacteria on BHI agar plates or  
319 processed for immunofluorescence as described below. The percentage of intracellular bacteria  
320 was determined as the ratio of intracellular bacteria of the initial inoculum.

321

### 322 ***Peptidoglycan labelling***

323 The Huh7 hepatocytes were seeded in a cell culture µ-dish (Clinisciences, ibidi 81156)  
324 four days before infection and then infected with GFP-expressing OG1RF *E. faecalis* as  
325 described in the section on cell infection. After 12 h of infection, 1 mM orange-red TAMRA-  
326 based fluorescent D-amino acid (RADDA, Tocris, 6649) was added to the µ-dish. After 38 h of  
327 infection, cells were washed 5 times in Hanks' balanced salt solution (HBSS) 1X and fixed in  
328 4% PFA for 20 min at room temperature. The Hoechst stain (Sigma B2261, 5 µg/ml) was used  
329 to stain DNA. As a control, remaining antibiotic-killed extracellular enterococci were detected  
330 using the rabbit anti-*Enterococcus* antiserum (diluted 1:1000) and a goat anti-rabbit-Alexa  
331 Fluor 647-conjugated secondary antibody (ThermoFisher Scientific, A-21244 diluted 1:200),  
332 as described above.

333

### 334 ***Extracellular/intracellular bacterial staining***

335           At each time point, cells were washed three times in PBS-Ca-Mg buffer (Gibco, DPBS,  
336 calcium, magnesium) and fixed with 4% paraformaldehyde (PFA) in PBS-Ca-Mg for 20 min.  
337 Fixed cells were washed twice with PBS-Ca-Mg and blocked using 5% BSA in PBS-Ca-Mg  
338 for 20 min. To discriminate intracellular bacteria from the remaining antibiotic-killed  
339 extracellular bacteria, double staining was performed where extracellular bacteria were stained  
340 prior to cell permeabilization, as previously described<sup>34</sup>. Briefly, for extracellular bacteria  
341 staining, the infected cells were incubated with a rabbit anti-*Streptococcus* group D antiserum  
342 (BD Diagnostics, Le Pont de Claix, France) diluted at 1:1000 in 2% BSA in PBS-Ca-Mg for 1  
343 h, washed 3 times, and incubated with a secondary goat anti-rabbit IgG antibody conjugated  
344 with Cy3 (Amersham Biosciences 1:400 in BSA 2% in PBS-Ca-Mg) for 1 h. After cell  
345 permeabilization, the rabbit anti-*Enterococcus* antiserum was used for 1 h prior to a secondary  
346 goat anti-rabbit IgG antibody conjugated with Alexa Fluor 488 diluted at 1:500 in BSA 2% in  
347 PBS-Ca-Mg for 1 h to label intracellular bacteria. The Hoechst stain (Sigma B2261, 5 µg/ml)  
348 was used to stain DNA. Samples were mounted on glass coverslips and analyzed with a  
349 fluorescent microscope (Carl Zeiss Axiovert 135, AxioObserver.Z1, KEYENCE BZ-X710).  
350 Images were acquired with a 40× or 100× oil immersion objective using a Zeiss AxioCam 506  
351 camera. Image quantification analysis was performed using Zen software (Carl Zeiss) and  
352 Image J software. At least 80 images (taken with 40×) and 50 images (taken with 100×) were  
353 quantified in total from three independent experiments.

354

### 355 ***Ethics statement***

356           All animals were housed under specific pathogen-free conditions in our local animal  
357 facility (IERP, INRAE, Jouy-en-Josas). Mice were fed irradiated food and autoclaved water ad  
358 libitum, in line with animal welfare guidelines. The animal house was maintained on a 12-h



359 light/dark cycle. Animal experiments were approved by the local ethics committee, the  
360 COMETHEA (“Comité d’Ethique en Expérimentation Animale du Centre INRAe de Jouy-en-  
361 Josas et AgroParisTech”), under registration number 19-08 and by the French Ministry of  
362 Higher Education and Research (APAFIS #20380-2019060315249683 v1) and were performed  
363 in accordance with European directive 2010/63/EU.

364

### 365 ***Primary mouse hepatocyte isolation and culture***

366 Primary mouse hepatocytes (PMH) were isolated from 8–10-week-old female C57BL/6  
367 mice. PMH were isolated by collagenase perfusion of the liver, as previously described <sup>53</sup>.  
368 Briefly, mice were anesthetized with xylazine (10 mg/kg IP) and ketamine (100 mg/kg IP) and  
369 subject to a mid-line laparotomy. The inferior vena cava was perfused with a 0.05% collagenase  
370 solution (collagenase from *Clostridium histolyticum*, Sigma C5138). The portal vein was  
371 sectioned, and the solution allowed to flow through the liver. Upon collagenase digestion,  
372 hepatic cells were removed by mechanical dissociation, filtered through a sterile 70 µm cell  
373 strainer (BD Falcon), and washed twice by centrifugation at 300 g for 4 min. After a filtration  
374 step through a sterile 40 µm cell strainer (BD Falcon), cells were resuspended in serum-  
375 containing culture medium (DMEM Gibco, 10% fetal bovine serum, 1% penicillin–  
376 streptomycin, and 100 µg/mL Fungizone). Cell count and viability were assessed by trypan  
377 blue exclusion. Cells (500,000 cells/well) were seeded in 6-well collagen-coated plates for 6 h  
378 at 37°C in a 5% CO<sub>2</sub> atmosphere. After complete adhesion of the hepatocytes and washes to  
379 remove the dead cells, PMH were cultured in hepatocyte culture medium (William's E medium,  
380 GlutaMAX™ Supplement, Gibco™ 32551020; 100 U/ml penicillin/streptomycin, Sigma  
381 P4333; 0.5 µg/ml Fungizone antimycotic B, Gibco 15290018; 4 µg/ml insulin, Sigma I0516;  
382 0.1 % bovine serum albumin, Sigma A8412 and 25 nM dexamethasone, Sigma D2915) at 37°C  
383 in a 5% CO<sub>2</sub> atmosphere for 4–6 days before infection.

384

### 385 ***Mouse infection and luminescence imaging***

386 Experiments were conducted on 9- to 10-week-old adult female BALB/cByJRj mice  
387 (Janvier Labs). All animals were adapted to the environment of the local animal facilities  
388 (IERP, INRAE, Jouy-en-Josas) for one week prior to the study. *E. faecalis* strain OG1RF,  
389 expressing the *lux* operon, was collected by centrifugation 1 h after bacteria had reached the  
390 stationary phase. Bacterial cells were washed twice with PBS buffer and stored at  $-80^{\circ}\text{C}$ . Mice  
391 were infected intravenously in the retro-orbital vein with  $5 \times 10^9$  CFUs. Serial dilutions of the  
392 inoculum were also transferred to plates as a control for determining inoculated *E. faecalis*  
393 numbers. Bioluminescent enterococci were imaged from mice under isoflurane anesthesia  
394 using the *In Vivo* Imaging System (IVIS spectrum BL, PerkinElmer) equipped with Living  
395 Image software (version 4.7.3, PerkinElmer) as reported previously<sup>52</sup>. When required, mice  
396 were sacrificed by cervical dislocation. Bioluminescence images of the mice were acquired  
397 with a 23.1 cm field of view (FOV). For liver lobes, the FOV value was 13.5. Photon emission  
398 was measured as radiance (photons per second per square centimeter per steradian,  $\text{p.s}^{-1}.\text{cm}^{-2}.\text{sr}^{-1}$ ).  
399 All luminescence images were adjusted on the same color scale and corrected (final pixel  
400 size: binning 4; pixel size smoothing: 5x5).

401

### 402 ***Histology and immunostaining***

403 Livers were fixed overnight in 4% paraformaldehyde and then embedded in paraffin.  
404 Immunohistochemistry was performed on paraffin sections (5  $\mu\text{m}$ ) using antibody F4-80 (Bio-  
405 rad, France; diluted 1:100). Sections were incubated overnight at  $4^{\circ}\text{C}$ , washed and incubated  
406 with an appropriate biotinylated secondary antibody for 1 h at room temperature, and then with  
407 streptavidin-HRP complex followed by 3,3-diaminobenzidine or 3-amino-9-ethylcarbazole  
408 detection (LSAB kit, Dako France). Sections were then counterstained with hematoxylin. For

409 immunofluorescence staining, sections were labelled with antibodies, rabbit anti-*Enterococcus*  
410 serum (diluted 1:2000), mouse monoclonal anti-claudin 1 (Clinisciences, sc-166338 diluted  
411 1:100), and mouse anti-Ly6G (Biolegend, France, clone A8; diluted 1:50), followed by staining  
412 with appropriate secondary antibodies, Alexa Fluor™ 488 (Invitrogen, ThermoFisher  
413 Scientific A-11008 diluted 1:250) or DyLight550 (ThermoFisher Scientific 84540, diluted  
414 1:250). Nuclei were stained with Hoechst 33342 (molecular probes). All sections were scanned  
415 using a NanoZoomer 2.0-RS digital slide scanner (Hamamatsu, Japan). Images were digitally  
416 captured from the scanned slides using NDP.view2 software (Hamamatsu). Sections labeled  
417 with claudin-1 were acquired with a 100× oil immersion objective using a Zeiss AxioCam 506  
418 camera. Images were processed with Zen software (Carl Zeiss).

419

#### 420 ***Statistical analyses***

421 Statistical analyses were performed with Prism 6 (GraphPad Software). An unpaired  
422 two-tailed Student's t-test was used to compare the means of the two groups. For multiple  
423 comparisons, data analysis was performed using the Kruskal-Wallis test with Dunnett's post-  
424 hoc test for comparison of means relative to the mean of a control group.

425

## 426 **Acknowledgments**

427           We are grateful to the IERP unit, INRAE (Infectiology of fishes and rodent facility, doi:  
428 10.15454/1.5572427140471238E12) and thank J. Rivière and M. Vilotte from the histology  
429 facility of UMR 1313 GABI, 78350, Jouy-en-Josas, France. We thank D. Lecharcheur for the  
430 gift of the *E. faecalis* OG1RF strain expressing the *luxABCDE* (*lux*) operon from *Photorhabdus*  
431 *luminescens*. We are very grateful to D. Deschamps for technical advice and assistance with  
432 IVIS experiments. We thank the Emerg'in platform for access to IVIS-Spectrum BL, which  
433 was financed by the Region Ile de France (DIMOneHealth).

434

## 435 **Disclosure statement**

436           No potential conflict of interest was reported by the author(s).

437

## 438 **Funding**

439           This work was supported in part by the INRAE-MICA division (AAP 2019) and ANR  
440 PERMALI (Project N° ANR-20-CE35-0001-01).

441

## 442 **Availability of data**

443           All data generated or analyzed during this study are included in this published article  
444 and its supplementary information files.

445

## 446 **Authors' contributions**

447           NN, ABD, GL, AL, FMB, and CA performed experiments and analyzed data. HB,  
448 AMC, PS and CA were involved on the conceptualization. PS and CA supervised and wrote  
449 the manuscript; all authors reviewed and approved the final manuscript.

450 **References**

- 451 1. Sharma A, Nagalli S. Chronic Liver Disease. StatPearls. Treasure Island (FL), 2021.
- 452 2. Cassard AM, Gerard P, Perlemuter G. Microbiota,liver diseases, and alcohol. Microbiol  
453 Spectr 2017; 5.
- 454 3. Arias CA, Murray BE. The rise of the *Enterococcus*: beyond vancomycin resistance. Nat  
455 Rev Microbiol 2012; 10:266-78.
- 456 4. Janka T, Tornai T, Borbely B, Tornai D, Altorjay I, Papp M, Vitalis Z. Deleterious effect  
457 of proton pump inhibitors on the disease course of cirrhosis. Eur J Gastroenterol Hepatol 2019.
- 458 5. Lin HF, Liao KF, Chang CM, Lin CL, Lai SW. Correlation between proton pump inhibitors  
459 and risk of pyogenic liver abscess. Eur J Clin Pharmacol 2017; 73:1019-25.
- 460 6. Imhann F, Bonder MJ, Vich Vila A, Fu J, Mujagic Z, Vork L, Tigchelaar EF,  
461 Jankipersadsing SA, Cenit MC, Harmsen HJ, et al. Proton pump inhibitors affect the gut  
462 microbiome. Gut 2016; 65:740-8.
- 463 7. Zhang J, Wang C, Wang J, Zhang F. Relationship between intestinal flora and  
464 inflammatory factors in patients with nonalcoholic steatohepatitis. Exp Ther Med 2018; 15:723-  
465 6.
- 466 8. Liu J, Wu D, Ahmed A, Li X, Ma Y, Tang L, Mo D, Ma Y, Xin Y. Comparison of the gut  
467 microbe profiles and numbers between patients with liver cirrhosis and healthy individuals.  
468 Curr Microbiol 2012; 65:7-13.
- 469 9. Freedberg DE, Zhou MJ, Cohen ME, Annavajhala MK, Khan S, Moscoso DI, Brooks C,  
470 Whittier S, Chong DH, Uhlemann AC, et al. Pathogen colonization of the gastrointestinal  
471 microbiome at intensive care unit admission and risk for subsequent death or infection.  
472 Intensive Care Med 2018.
- 473 10. Taur Y, Xavier JB, Lipuma L, Ubeda C, Goldberg J, Gobourne A, Lee YJ, Dubin KA,  
474 Socci ND, Viale A, et al. Intestinal domination and the risk of bacteremia in patients undergoing

- 475 allogeneic hematopoietic stem cell transplantation. *Clinical Infectious Diseases: An Official*  
476 *Publication of the Infectious Diseases Society of America* 2012; 55:905-14.
- 477 11. Ubeda C, Taur Y, Jenq RR, Equinda MJ, Son T, Samstein M, Viale A, Socci ND, van den  
478 Brink MR, Kamboj M, et al. Vancomycin-resistant *Enterococcus* domination of intestinal  
479 microbiota is enabled by antibiotic treatment in mice and precedes bloodstream invasion in  
480 humans. *J Clin Invest* 2010; 120:4332-41.
- 481 12. Archambaud C, Derre-Bobillot A, Lapaque N, Rigottier-Gois L, Serror P. Intestinal  
482 translocation of enterococci requires a threshold level of enterococcal overgrowth in the lumen.  
483 *Sci Rep* 2019; 9:8926.
- 484 13. Chakraborty R, Lam V, Kommineni S, Stromich J, Hayward M, Kristich CJ, Salzman NH.  
485 Ceftriaxone administration disrupts intestinal homeostasis, mediating non-inflammatory  
486 proliferation and dissemination of commensal enterococci. *Infect Immun* 2018.
- 487 14. Llorente C, Jepsen P, Inamine T, Wang L, Bluemel S, Wang HJ, Loomba R, Bajaj JS,  
488 Schubert ML, Sikaroodi M, et al. Gastric acid suppression promotes alcoholic liver disease by  
489 inducing overgrowth of intestinal *Enterococcus*. *Nat Commun* 2017; 8:837.
- 490 15. Llovet JM, Bartoli R, March F, Planas R, Vinado B, Cabre E, Arnal J, Coll P, Ausina V,  
491 Gassull MA. Translocated intestinal bacteria cause spontaneous bacterial peritonitis in cirrhotic  
492 rats: molecular epidemiologic evidence. *J Hepatol* 1998; 28:307-13.
- 493 16. Duan Y, Llorente C, Lang S, Brandl K, Chu H, Jiang L, White RC, Clarke TH, Nguyen K,  
494 Torralba M, et al. Bacteriophage targeting of gut bacterium attenuates alcoholic liver disease.  
495 *Nature* 2019; 575:505-11.
- 496 17. Bertuccini L, Ammendolia MG, Superti F, Baldassarri L. Invasion of HeLa cells by  
497 *Enterococcus faecalis* clinical isolates. *Med Microbiol Immunol* 2002; 191:25-31.

- 498 18. Horsley H, Malone-Lee J, Holland D, Tuz M, Hibbert A, Kelsey M, Kupelian A, Rohn JL.  
499 *Enterococcus faecalis* subverts and invades the host urothelium in patients with chronic urinary  
500 tract infection. PLoS One 2013; 8:e83637.
- 501 19. Elhadidy M, Zahran E. Biofilm mediates *Enterococcus faecalis* adhesion, invasion and  
502 survival into bovine mammary epithelial cells. Lett Appl Microbiol 2014; 58:248-54.
- 503 20. Wells CL, van de Westerlo EM, Jechorek RP, Erlandsen SL. Intracellular survival of  
504 enteric bacteria in cultured human enterocytes. Shock (Augusta, Ga) 1996; 6:27-34.
- 505 21. Waters CM, Wells CL, Dunny GM. The aggregation domain of aggregation substance, not  
506 the RGD motifs, is critical for efficient internalization by HT-29 enterocytes. Infect Immun  
507 2003; 71:5682-9.
- 508 22. Millan D, Chiriboga C, Patarroyo MA, Fontanilla MR. *Enterococcus faecalis*  
509 internalization in human umbilical vein endothelial cells (HUVEC). Microb Pathog 2013;  
510 57:62-9.
- 511 23. Horsley H, Dharmasena D, Malone-Lee J, Rohn JL. A urine-dependent human urothelial  
512 organoid offers a potential alternative to rodent models of infection. Sci Rep 2018; 8:1238.
- 513 24. Zou J, Shankar N. The opportunistic pathogen *Enterococcus faecalis* resists phagosome  
514 acidification and autophagy to promote intracellular survival in macrophages. Cellular  
515 Microbiology 2016; 18:831-43.
- 516 25. Gentry-Weeks CR, Karkhoff-Schweizer R, Pikis A, Estay M, Keith JM. Survival of  
517 *Enterococcus faecalis* in mouse peritoneal macrophages. Infect Immun 1999; 67:2160-5.
- 518 26. Rakita RM, Quan VC, Jacques-Palaz K, Singh KV, Arduino RC, Mee M, Murray BE.  
519 Specific antibody promotes opsonization and PMN-mediated killing of phagocytosis-resistant  
520 *Enterococcus faecium*. FEMS Immunol Med Microbiol 2000; 28:291-9.
- 521 27. Benjamin JL, Sumpter R, Jr., Levine B, Hooper LV. Intestinal epithelial autophagy is  
522 essential for host defense against invasive bacteria. Cell Host Microbe 2013; 13:723-34.

- 523 28. Nunez N, Derre-Bobillot A, Gaubert S, Herry JM, Deschamps J, Wei Y, Baranek T, Si-  
524 Tahar M, Briandet R, Serror P, et al. Exploration of the role of the virulence factor ElrA during  
525 *Enterococcus faecalis* cell infection. *Sci Rep* 2018; 8:1749.
- 526 29. VanCleave TT, Pulsifer AR, Connor MG, Warawa JM, Lawrenz MB. Impact of gentamicin  
527 concentration and exposure time on intracellular *Yersinia pestis*. *Front Cell Infect Microbiol*  
528 2017; 7:505.
- 529 30. Bongers S, Hellebrekers P, Leenen LPH, Koenderman L, Hietbrink F. Intracellular  
530 penetration and effects of antibiotics on *Staphylococcus aureus* inside human neutrophils: a  
531 comprehensive review. *Antibiotics (Basel)* 2019; 8.
- 532 31. Pagliano P, Arslan F, Ascione T. Epidemiology and treatment of the commonest form of  
533 listeriosis: meningitis and bacteraemia. *Infez Med* 2017; 25:210-6.
- 534 32. Hsu YP, Rittichier J, Kuru E, Yablonowski J, Pasciak E, Tekkam S, Hall E, Murphy B,  
535 Lee TK, Garner EC, et al. Full color palette of fluorescent D-amino acids for *in situ* labeling of  
536 bacterial cell walls. *Chem Sci* 2017; 8:6313-21.
- 537 33. Pizarro-Cerdá J, Lecuit M, Cossart P. Measuring and analysing invasion of mammalian  
538 cells by bacterial pathogens: The *Listeria monocytogenes* system. *Methods in Microbiology*  
539 2002; 31:Pages 161-77.
- 540 34. Brinster S, Posteraro B, Bierne H, Alberti A, Makhzami S, Sanguinetti M, Serror P.  
541 Enterococcal leucine-rich repeat-containing protein involved in virulence and host  
542 inflammatory response. *Infect Immun* 2007; 75:4463-71.
- 543 35. Evans MJ, von Hahn T, Tscherne DM, Syder AJ, Panis M, Wolk B, Hatzioannou T,  
544 McKeating JA, Bieniasz PD, Rice CM. Claudin-1 is a hepatitis C virus co-receptor required for  
545 a late step in entry. *Nature* 2007; 446:801-5.
- 546 36. Ciocan D, Cassard AM. Intestinal bacteria involved in nutritional liver disease killed by  
547 phagotherapy: a new therapeutic target. *Med Sci (Paris)* 2020; 36:310-2.



- 548 37. Tay WH, Silva RAGd, Ho FK, Kelvin K.L. Chong, Ludwig A, Kline KA. *Enterococcus*  
549 *faecalis* persists and replicates within epithelial cells *in vitro* and *in vivo* during wound  
550 infection. Available from <https://www.biorxiv.org/content/101101/20210916460717v1>  
551 doi: 101101/20210916460717  
552 BioRxiv [Preprint]. 2021.
- 553 38. O'Neill AM, Thurston TL, Holden DW. Cytosolic replication of group A *Streptococcus* in  
554 human macrophages. *mBio* 2016; 7:e00020-16.
- 555 39. Ercoli G, Fernandes VE, Chung WY, Wanford JJ, Thomson S, Bayliss CD, Straatman K,  
556 Crocker PR, Dennison A, Martinez-Pomares L, et al. Intracellular replication of *Streptococcus*  
557 *pneumoniae* inside splenic macrophages serves as a reservoir for septicemia. *Nat Microbiol*  
558 2018; 3:600-10.
- 559 40. Watkins KE, Unnikrishnan M. Evasion of host defenses by intracellular *Staphylococcus*  
560 *aureus*. *Adv Appl Microbiol* 2020; 112:105-41.
- 561 41. Rubio T, Gagné S, Debruyne C, Dias C, Cluzel C, Mongellaz D, Rousselle P, Göttig S,  
562 Seifert H, Higgins PG, et al. Incidence of an intracellular multiplication niche amongst  
563 *Acinetobacter baumannii* clinical isolates. Available from  
564 <https://www.biorxiv.org/content/101101/20210415439986v1>  
565 doi: 101101/20210415439986 BioRxiv [Preprint]. 2021.
- 566 42. Sterkel AK, Mettelman R, Wuthrich M, Klein BS. The unappreciated intracellular lifestyle  
567 of *Blastomyces dermatitidis*. *J Immunol* 2015; 194:1796-805.
- 568 43. Gaca AO, Lemos JA. Adaptation to adversity: the intermingling of stress tolerance and  
569 pathogenesis in Enterococci. *Microbiol Mol Biol Rev* 2019; 83.
- 570 44. Cossart P, Roy CR. Manipulation of host membrane machinery by bacterial pathogens.  
571 *Curr Opin Cell Biol* 2010; 22:547-54.

- 572 45. Couzens LP, Wing EJ. Innate defenses in the liver during *Listeria* infection. *Immunol Rev*  
573 2000; 174:150-9.
- 574 46. Harvey BS, Baker CJ, Edwards MS. Contributions of complement and immunoglobulin to  
575 neutrophil-mediated killing of enterococci. *Infect Immun* 1992; 60:3635-40.
- 576 47. Leendertse M, Willems RJ, Giebelen IA, Roelofs JJ, Bonten MJ, van der Poll T.  
577 Neutrophils are essential for rapid clearance of *Enterococcus faecium* in mice. *Infect Immun*  
578 2009; 77:485-91.
- 579 48. Eguchi A, Iwasa M, Tamai Y, Tempaku M, Takamatsu S, Miyoshi E, Hasegawa H,  
580 Kobayashi Y, Takei Y. Branched-chain amino acids protect the liver from cirrhotic injury via  
581 suppression of activation of lipopolysaccharide-binding protein, toll-like receptor 4, and signal  
582 transducer and activator of transcription 3, as well as *Enterococcus faecalis* translocation.  
583 *Nutrition* 2021; 86:111194.
- 584 49. Dunny GM, Brown BL, Clewell DB. Induced cell aggregation and mating in *Streptococcus*  
585 *faecalis*: evidence for a bacterial sex pheromone. *Proc Natl Acad Sci U S A* 1978; 75:3479-83.
- 586 50. Jacob AE, Hobbs SJ. Conjugal transfer of plasmid-borne multiple antibiotic resistance in  
587 *Streptococcus faecalis* var. *zymogenes*. *J Bacteriol* 1974; 117:360-72.
- 588 51. Cortes-Perez NG, Dumoulin R, Gaubert S, Lacoux C, Bugli F, Martin R, Chat S, Piquand  
589 K, Meylheuc T, Langella P, et al. Overexpression of *Enterococcus faecalis* *elr* operon protects  
590 from phagocytosis. *BMC Microbiol* 2015; 15:112.
- 591 52. Saillant V, Lipuma D, Ostyn E, Joubert L, Boussac A, Guerin H, Brandelet G, Arnoux P,  
592 Lechardeur D. A novel *Enterococcus faecalis* heme transport regulator (FhtR) senses host heme  
593 to control its intracellular homeostasis. *mBio* 2021; 12.
- 594 53. Fortier M, Celton-Morizur S, Desdouets C. Incomplete cytokinesis/binucleation in  
595 mammals: The powerful system of hepatocytes. *Methods Cell Biol* 2017; 137:119-42.
- 596

597 **FIGURE LEGENDS**

598

599 **Fig 1. *Enterococcus faecalis* divides during the infection of human hepatocytes.**

600 Exponentially growing *E. faecalis* OG1RF cultures were used to infect Huh7 cells for 48 h. **(A)**

601 The percentage of intracellular bacteria in Huh7 cells was determined as the ratio of intracellular

602 bacteria of the initial inoculum and compared in two antibiotic cocktails containing gentamycin

603 (G) and vancomycin (V) with or without amoxicillin (Ax). Data are represented by box-whisker

604 plot (min to max) of five independent experiments. Each dot represents one independent

605 experiment. The horizontal bar indicates the median value. Statistical analysis was performed

606 using an unpaired Student's t test. Asterisks indicate a p-value considered statistically

607 significant (\*\*,  $P < 0.01$ ; \*\*\*,  $P < 0.001$ ; \*\*\*\*,  $P < 0.0001$ ), NS, non-significant difference. **(B)**

608 *E. faecalis* growing in BHI-rich medium were labeled with the orange-red TAMRA-based

609 fluorescent D-amino acid (RADA) labeling peptidoglycan in live bacteria for 40 min. The

610 RADA signal was detected in the mid cell corresponding to the septal ring (asterisks) and to

611 equatorial rings (white arrow heads). **(C)** Huh7 cells were infected with GFP-expressing *E.*

612 *faecalis* for 36 h. Twelve hours after the addition of the antibiotic-containing medium, infected

613 cells were incubated with RADA. Representative micrographs of individual *E. faecalis* **(left**

614 **panels)** and enterococcal clusters **(right panels)** in Huh7 cells are shown from two independent

615 experiments. The image is an overlay of the phase contrast, intracellular *E. faecalis* (green

616 channel), extracellular *E. faecalis* (pink channel), and nuclei (blue channel). The scale bar

617 corresponds to 5  $\mu\text{m}$ . One framed enterococcal cluster is shown at a higher magnification below

618 (Bar: 1  $\mu\text{m}$ ). The framed image is an overlay of intracellular *E. faecalis* (green channel) and

619 RADA (red channel). Asterisks indicate signals detected in the mid cell corresponding to the

620 septal ring. White arrows indicate equatorial ring signals.

621

622 **Fig 2. Intracellular *E. faecalis* forms clusters within hepatocytes.** (A) Representative  
623 micrograph of Huh7 cells infected for 5 (left panel) and 48 h (right panel) with *E. faecalis*  
624 OG1RF observed in six independent experiments (objective 100x). The image is an overlay of  
625 the phase contrast, intracellular *E. faecalis* (green channel), antibiotic-killed extracellular *E.*  
626 *faecalis* (red channel), and nuclei (blue channel). White arrowheads indicate intracellular  
627 clusters. The scale bar corresponds to 10  $\mu\text{m}$ . Two framed enterococcal clusters are shown at a  
628 higher magnification (Bar: 1  $\mu\text{m}$ ). (B) Quantification of the percentage of cells according to the  
629 number of enterococci within the intracellular cluster in Huh7 cells. For each time point, at least  
630 3,400 cells were examined at low magnification (objective 40x) from three independent  
631 experiments. A framed enterococcal cluster exhibiting more than 20 cocci is shown at a higher  
632 magnification (Bar: 1  $\mu\text{m}$ ). (C) Representative micrograph of HepG2 and primary mouse  
633 hepatocytes infected 24 h with *E. faecalis* OG1RF observed in two independent experiments.  
634 The image is an overlay of the phase contrast, intracellular *E. faecalis* (green channel),  
635 extracellular *E. faecalis* (red channel), and nuclei (blue channel). The scale bar corresponds to  
636 10  $\mu\text{m}$ . For each cell type, one intracellular enterococcal cluster indicated by a white arrowhead  
637 is shown at a higher magnification (Bar: 1  $\mu\text{m}$ ).

638

639 **Fig 3. Formation of enterococcal clusters *in vivo* accompanies induction of the innate**  
640 **immune response.** Female BALB/c mice were infected intravenously with  $5 \times 10^9$  CFUs of the  
641 OG1RF *lux* strain. (A) Representative images of liver histological sections after 6 and 24 h of  
642 infection are shown with noninfected control mice. Section of the largest liver lobe was labeled  
643 with anti-*Streptococcus* group D antiserum (*E. faecalis* in green) and Hoechst (nuclei in blue).  
644 (B) Intracellular *E. faecalis* clusters (green) were observed at 24 h in multinucleated (Hoechst,  
645 blue) claudin-1 expressing hepatocytes (red). A white arrowhead indicates an intracellular  
646 cluster in the hepatocyte, which is shown at a higher magnification (Bar: 2  $\mu\text{m}$ ). (C)

647 Representative sections of the largest liver lobe labeled with hematoxylin and eosin and with  
648 an F4/80 antibody to detect Kupffer macrophages (brown cells, left panels), and with an anti-  
649 Ly6G antibody to stain neutrophils (green cells, right panels) and Hoechst (nuclei in blue).

650

651 **Fig 4. Intracellular growth of *E. faecalis* is a strain-and cell-type-dependent process. (A)**

652 Three *E. faecalis* strains (OG1RF, JH2-2, and Symbioflor) were used to infect HepG2 cells for  
653 48 h. The percentage of intracellular bacteria was determined as the ratio of intracellular  
654 bacteria of the initial inoculum. All data are represented by a box-whiskers plot (Min to Max)  
655 of seven independent experiments. Each dot represents one independent experiment. The  
656 horizontal bar indicates the median value. Statistical analysis was performed using an unpaired  
657 Student's t test. Asterisks indicate a p-value considered statistically significant (\*,  $P < 0.05$ , \*\*,  $P < 0.01$ ),  
658 NS, non-significant difference. The three *E. faecalis* strains (OG1RF, JH2-2, and  
659 Symbioflor) were also used to infect A704 (B) and ACHN (C) kidney cells for 48 h. The  
660 percentage of intracellular bacteria was determined as the ratio of intracellular bacteria of the  
661 initial inoculum. All data are represented by a box-whisker plot (min to max) of five  
662 independent experiments. Each dot represents one independent experiment. The horizontal bar  
663 indicates the median value. Statistical analysis was performed using an unpaired Student's t test.  
664 Asterisks indicate a p-value considered statistically significant (\*,  $P < 0.05$ , \*\*,  $P < 0.01$ ), NS,  
665 non-significant difference.

666 **SUPPLEMENTARY FIGURE LEGENDS**

667

668 **Supp. Fig S1.** Representative micrographs of extracellular *E. faecalis* upon Huh7 infection with  
669 the GFP-expressing *E. faecalis* OG1RF and incubated with the orange-red TAMRA-based  
670 fluorescent D-amino acid (RADA). The image is an overlay of the phase contrast, extracellular  
671 *E. faecalis* (pink channel), and nuclei (blue channel). The scale bar corresponds to 5  $\mu\text{m}$ .  
672 Absence of RADA signal on antibiotic-killed extracellular *E. faecalis* is shown at a higher  
673 magnification below (Bar: 1  $\mu\text{m}$ ).

674

675 **Supp. Fig S2. Quantification of the formation of *E. faecalis* intracellular clusters in Huh7**  
676 **hepatocytes.** Exponentially growing *E. faecalis* OG1RF cultures were used to infect Huh7 cells  
677 for 48 h. Percentage of cells exhibiting at least one cluster (**A**), as well as the number of  
678 enterococci (triangle symbol) by clusters, (**B**) are shown. For each time point, at least 600 cells  
679 were examined at high magnification (objective 100 $\times$ ) from three independent experiments.  
680 Asterisks indicate statistical significance compared with the 30 min condition using the  
681 Kruskal-Wallis one-way ANOVA followed by Dunnett's test for multiple comparisons (\*,  $P <$   
682 0.05, \*\*,  $P <$  0.01; \*\*\*,  $P <$  0.001). All data are represented by a box-whiskers plot (min to  
683 max) of at least four independent experiments. Each dot represents one independent  
684 experiment. The horizontal bar indicates the median value.

685

686 **Supp. Fig S3. *In vivo* imaging of *E. faecalis* infection.** Female BALB/c mice were infected  
687 intravenously with  $5 \times 10^9$  CFUs of the OG1RF *lux* strain. At 6 and 24 h post-infection,  
688 anesthetized mice were imaged using the IVIS 200 system. Representative animals and livers  
689 from two independent experiments are shown. Photon emission was measured as radiance  
690 (photons per second per square centimeter per steradian,  $\text{p.s}^{-1}.\text{cm}^{-2}.\text{sr}^{-1}$ ). Luminescence images

691 from mice were adjusted for the color scale at minimum or  $\text{Min}=8\times 10^4$  and maximum or  
692  $\text{Max}=1.5\times 10^6 \text{ p.s}^{-1}.\text{cm}^{-2}.\text{sr}^{-1}$ . Luminescence images from the liver were adjusted at  $\text{Min}= 1\times 10^5$   
693 and maximum or  $\text{Max}=2.5\times 10^6 \text{ p.s}^{-1}.\text{cm}^{-2}.\text{sr}^{-1}$ . Rainbow images show the relative level of  
694 luminescence ranging from low (blue) to high (red).

695

696 **Supp. Fig S4. Formation of intracellular *E. faecalis* clusters in kidney cells.** Quantification  
697 of the percentage of cells according to the number of enterococci within the intracellular cluster  
698 in A704 and ACHN cells. For each time point, at least 2,500 cells were examined at low  
699 magnification (objective 40 $\times$ ) from three independent experiments.

700

701

Figure 1

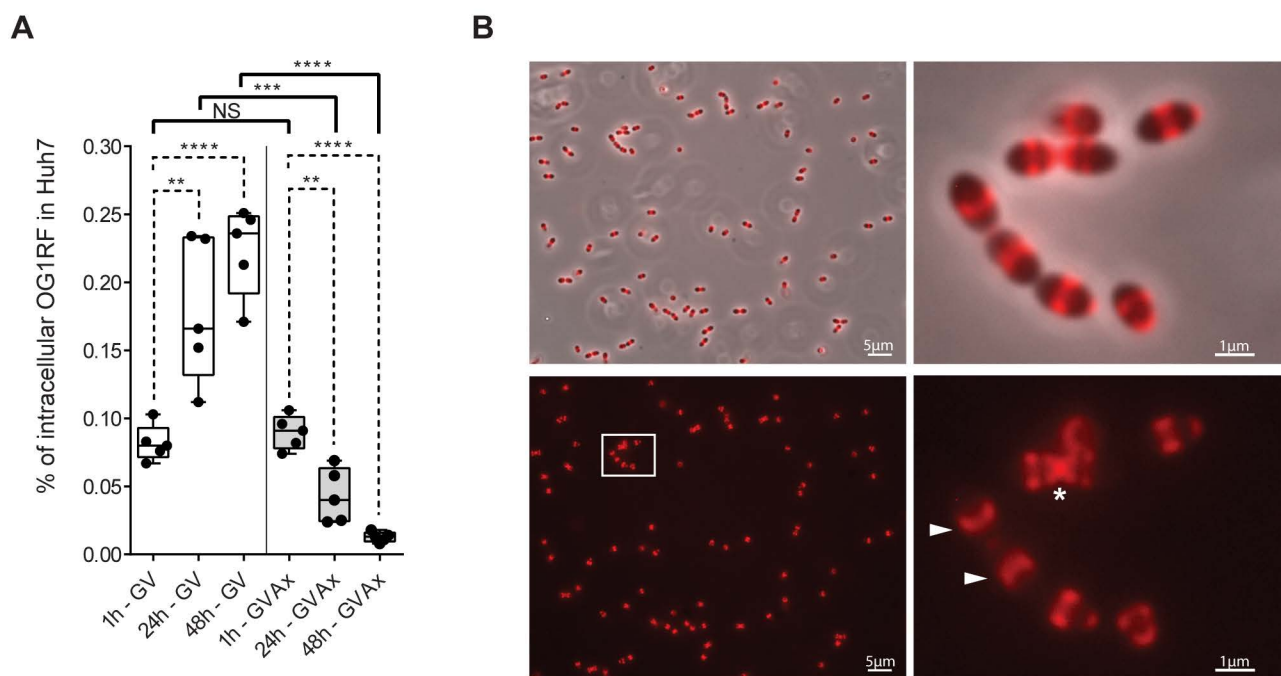

**C**

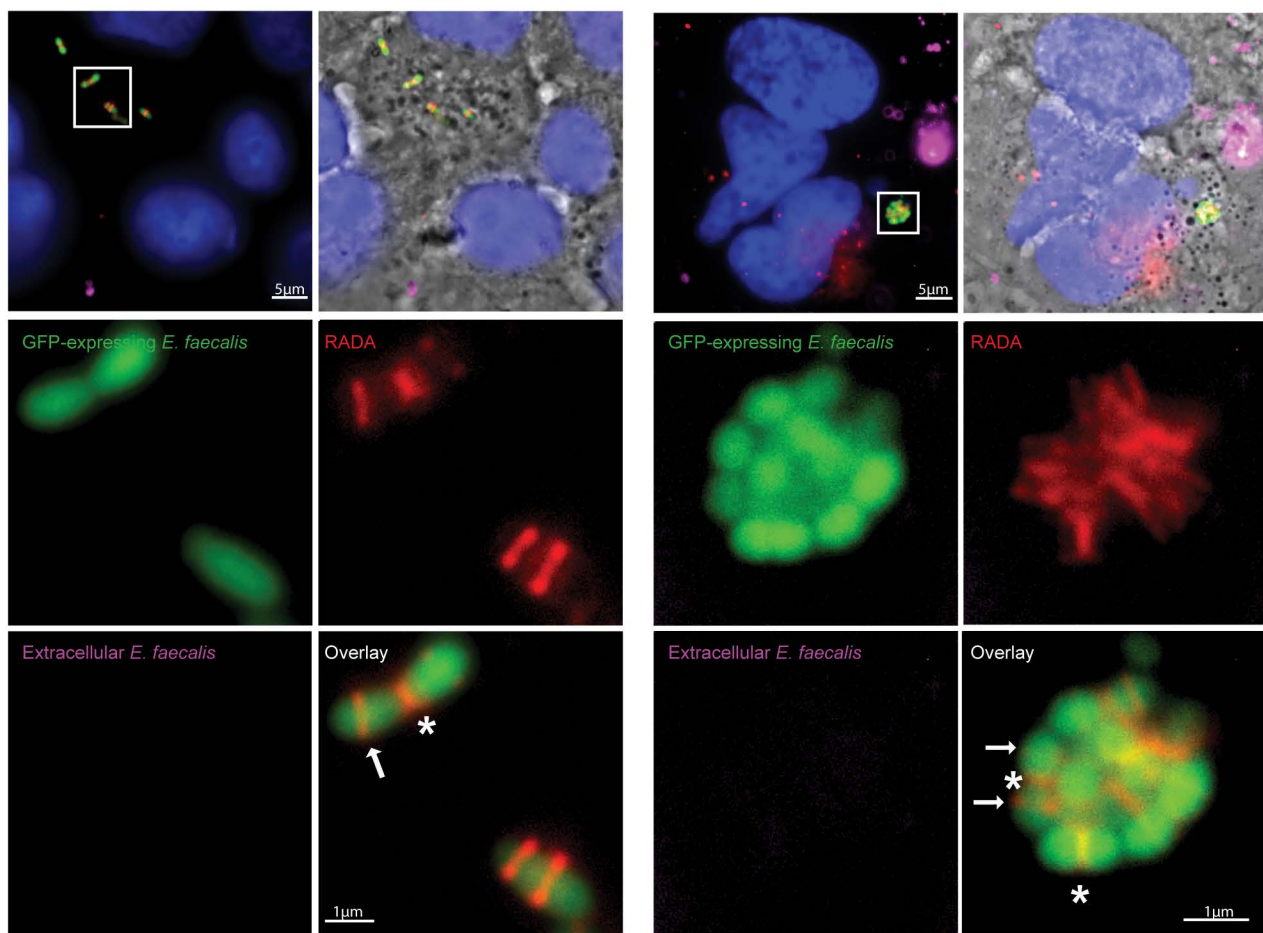



**Figure 2****A**

Huh7 cells

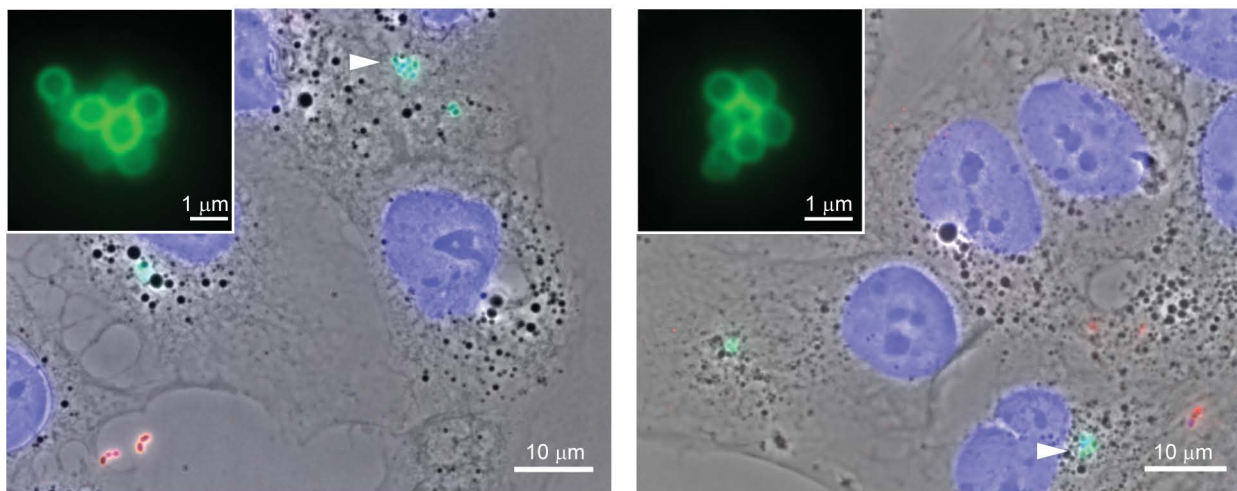**B**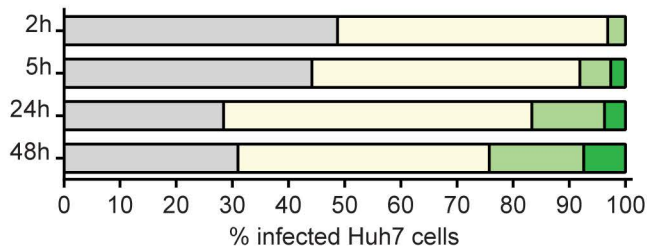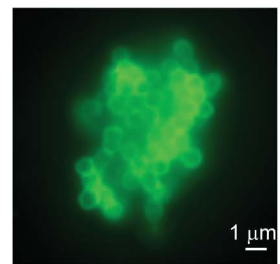**C**

HepG2 cells

Murine primary hepatocytes

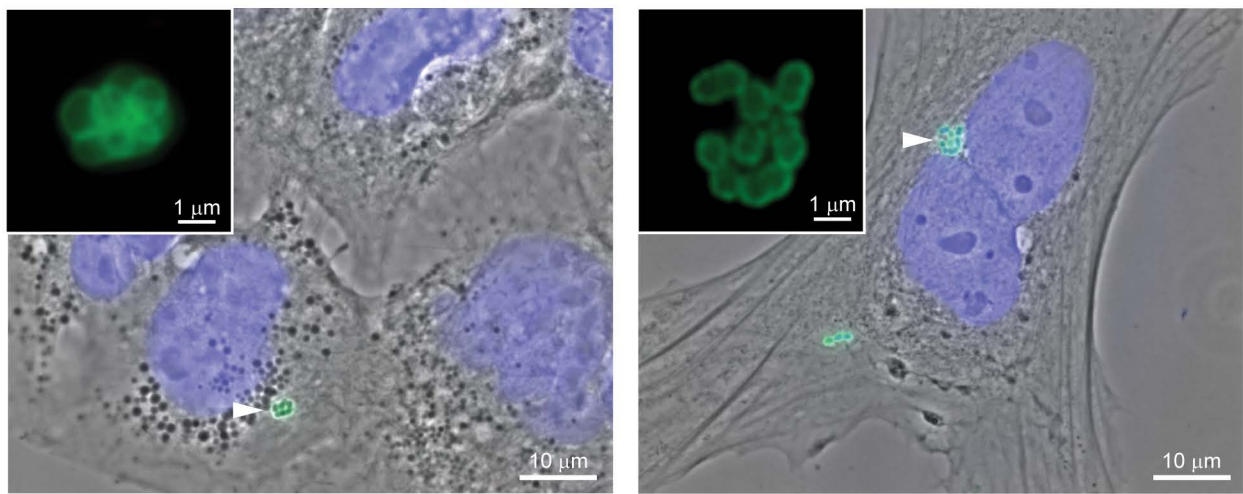

**Figure 3**

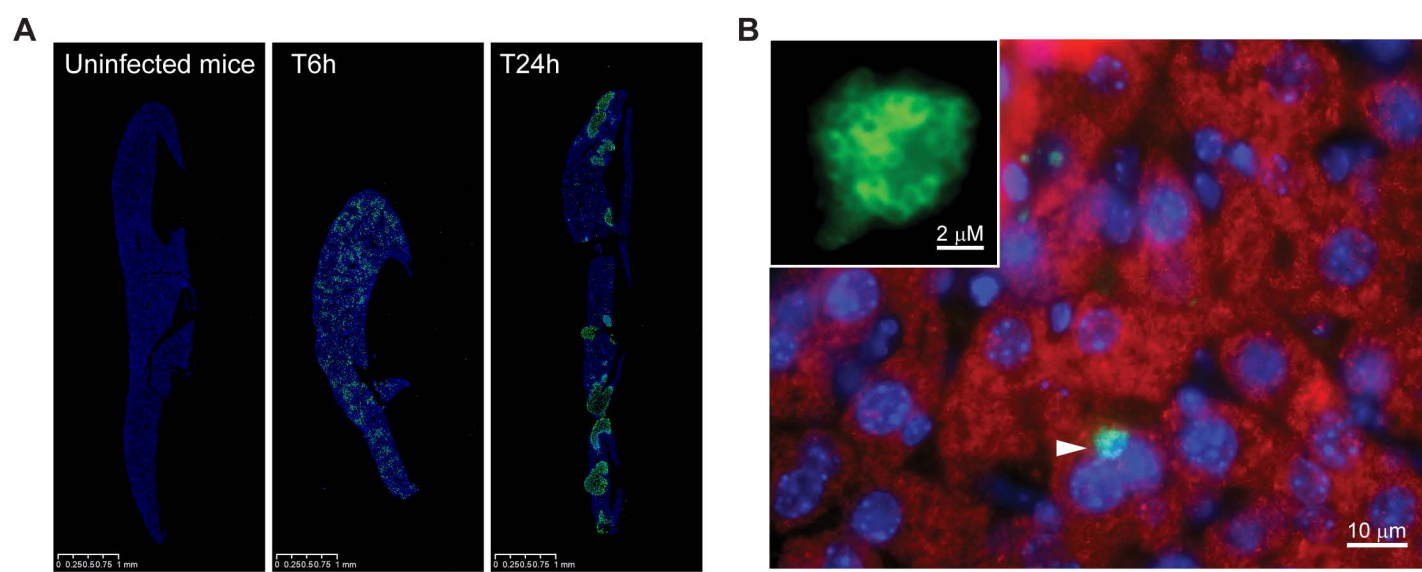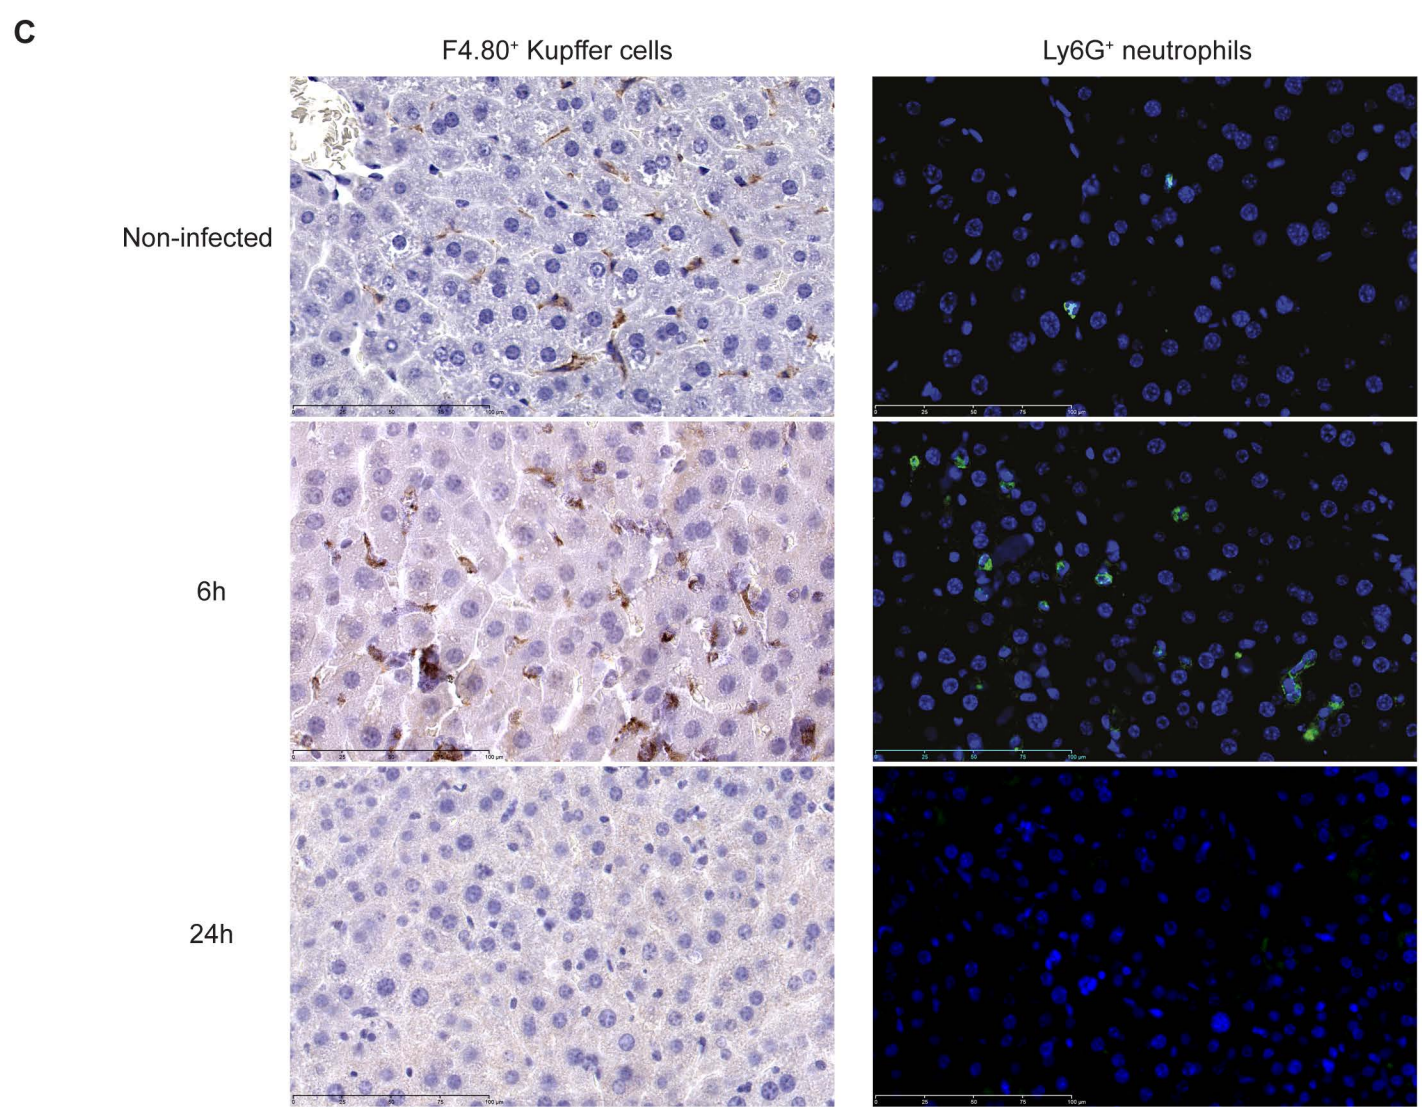

**Figure 4****A**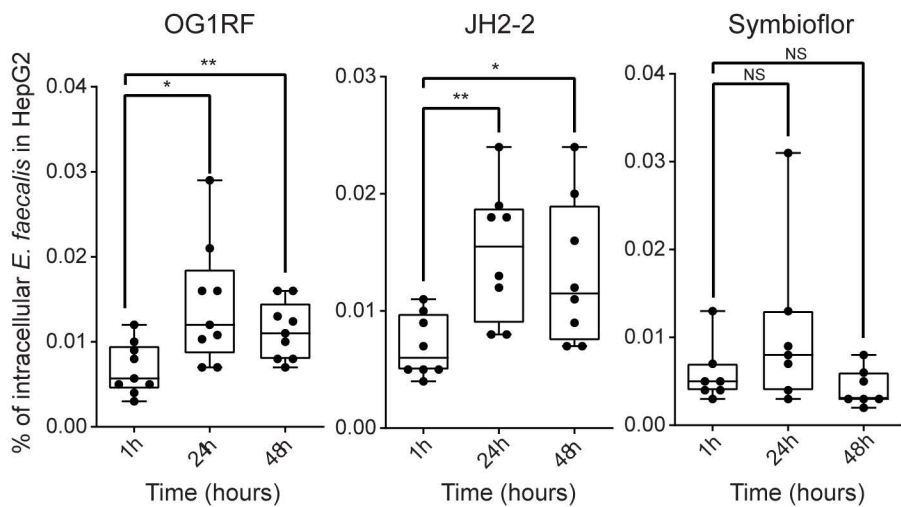**B**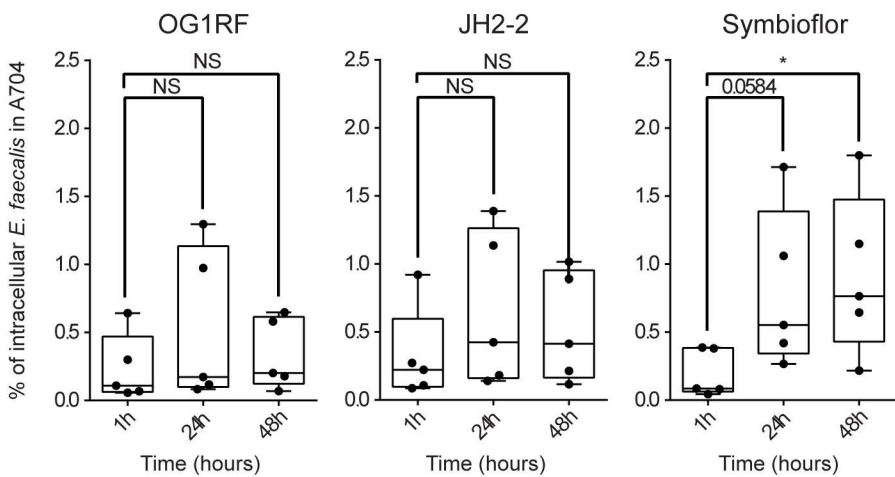**C**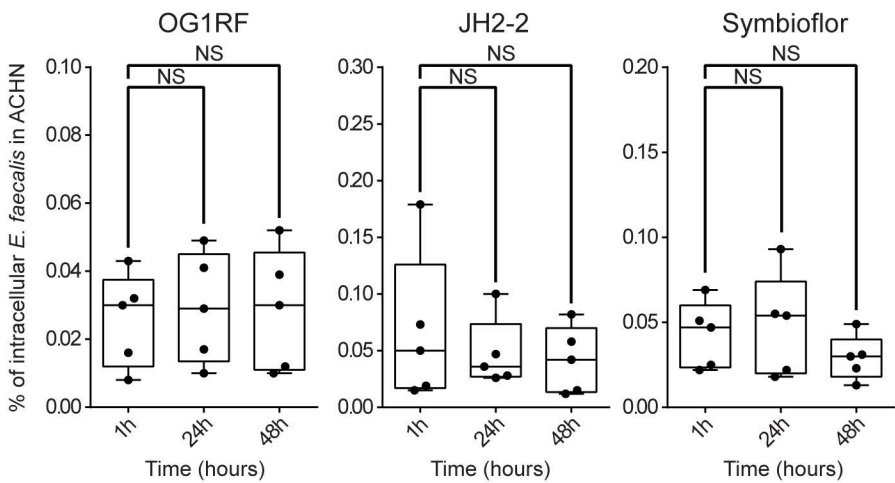

Source: http://biorxiv.org/content/10.1101/2021.09.30.462169v1.full.pdf
